# Supplementary material for: Ablation of Coactivator Med1 Switches the Cell Fate of Dental Epithelia to That Generating Hair
Source: PubMed Central journal article supplement (PMC4065011; doi:10.1371/journal.pone.0099991), 2014-06-20
Supplement: pone.0099991.s005.pdf [file pone.0099991.s005.pdf]

## Table S2

| Category                           | Entrez Gene Name                          | Symbol    | Fold Change | Entrez Gene ID for Mouse |
|------------------------------------|-------------------------------------------|-----------|-------------|--------------------------|
| <b>Hair Differentiation</b>        | Calcium Binding Differentiation           | S100a3    | 27.74       | --                       |
|                                    | Peptidyl Arginin Deiminase                | Padi1     | 6.85        | --                       |
| <b>Wnt Signaling</b>               | Wingless-related MMTV Integration Site 3A | Wnt3a     | 2.59        | 22416                    |
|                                    | Frizzled Homolog 10                       | Fzd10     | 1.09        | 93897                    |
|                                    | OVO Homolog-like 1                        | Ovol1     | 4.64        | 18426                    |
| <b>Transcription factors</b>       | GATA binding protein 3                    | GATA3     | 16.768      | 14462                    |
|                                    | homeobox C13                              | HOXC13    | 8.809       | 15422                    |
|                                    | POU class 3 homeobox 1                    | POU3F1    | 7.651       | 18991                    |
|                                    | homeobox B7                               | HOXB7     | 6.895       | 15415                    |
|                                    | homeobox C6                               | HOXC6     | 6.034       | 15425                    |
| <b>Type I Hair IRS</b>             | Keratin 27                                | Krt27     | 7.01        | 16675                    |
| <b>Type I Hair Keratins</b>        | Keratin 31                                | Krt31     | 27.51       | 16660                    |
|                                    | Keratin 32                                | Krt32     | 3.50        | 16670                    |
|                                    | Keratin 33                                | Krt33a    | 55.88       | 71888                    |
|                                    | Keratin 35                                | Krt35     | 16.38       | 53617                    |
|                                    | Keratin 36                                | Krt36     | 2.08        | 16673                    |
| <b>Type II Hair IRS</b>            | Keratin 71                                | Krt71     | 18.04       | 56735                    |
|                                    | Keratin 72                                | Krt72     | 16.60       | --                       |
|                                    | Keratin 73                                | Krt73     | 21.99       | 223915                   |
| <b>Type II Hair Keratins</b>       | Keratin 84                                | Krt84     | 5.00        | 16680                    |
|                                    | Keratin 85                                | Krt85     | 9.98        | 53622                    |
|                                    | Keratin 86                                | Krt86     | 41.26       | --                       |
| <b>Hair Related</b>                | Keratin Associated Protein 4-7            | Krtap4-7  | 8.02        | 76444                    |
| <b>Keratin Associated Proteins</b> | Keratin Associated Protein 4-11           | krtap4-11 | 4.54        | 665891                   |
|                                    | Keratin Associated Protein 5-1            | Krtap5-1  | 2.09        | 50774                    |
|                                    | Keratin Associated Protein 6-2            | Krtap6-2  | 3.9         | 16701                    |
|                                    | Keratin Associated Protein 9-1            | Krtap9-1  | 6.95        | --                       |
|                                    | Keratin Associated Protein 13-1           | Krtap13-1 | 0.96        | 69696                    |
|                                    | Keratin Associated Protein 16-3           | Krtap16-3 | 10.46       | 170653                   |
|                                    | Keratin Associated Protein 16-4           | Krtap16-4 | 6.98        | 170654                   |
|                                    | Keratin Associated Protein 16-8           | Krtap16-8 | 9.45        | 68484                    |
|                                    | Keratin Associated Protein 16-8           | Krtap16-9 | 4.10        | 170657                   |
