# Supplementary material for: Ablation of Coactivator Med1 Switches the Cell Fate of Dental Epithelia to That Generating Hair
Source: PubMed Central journal article supplement (PMC4065011; doi:10.1371/journal.pone.0099991), 2014-06-20
Supplement: pone.0099991.s006.pdf [file pone.0099991.s006.pdf]

# Table S3

| Category                            | Entrez Gene Name                                       | Symbol    | Fold Change | Entrez Gene ID for Mouse |
|-------------------------------------|--------------------------------------------------------|-----------|-------------|--------------------------|
| <b>Transcription factors</b>        | Grainyhead-like 1 (Drosophila)                         | Grhl1     | 19.41       | 195733                   |
|                                     | Transcription factor AP-2, gamma                       | TCFAP2C   | 3.47        | 21420                    |
|                                     | c-Fos (AP-1)                                           | FOS       | 1.54        | 14281                    |
| <b>Cornified envelope</b>           | Corneodesmosin                                         | Cdsn      | 45.99       | 386463                   |
|                                     | Cornifelin                                             | Cnfn      | 20.95       | 72383                    |
|                                     | Cornified envelope 1B                                  | Sprrl2    | 2.76        | 73722                    |
|                                     | Keratinocyte differentiation associated protein        | Krtdap    | 39.95       | 64661                    |
|                                     | Late cornified envelope 1B                             | Sprrl5    | 4.24        | 68720                    |
|                                     | Loricrin                                               | Lor       | 40.69       | 16939                    |
|                                     | Repetin                                                | Rptn      | 3.00        | 20129                    |
|                                     | Small proline-rich protein 1B                          | Sprr1b    | 24.19       | 20754                    |
|                                     | Small proline-rich protein 2D                          | Sprr2d    | 3.24        | 20758                    |
|                                     | Small proline-rich-like 7                              | Sprrl7    | 2.36        | 69611                    |
|                                     | <b>Epidermal keratins</b>                              | Keratin 1 | Krt2-1      | 3.07                     |
| Keratin 10                          |                                                        | Krt10     | 12.69       | 16661                    |
| Keratin 15                          |                                                        | Krt15     | 10.96       | 16665                    |
| Keratin 17                          |                                                        | Krt1-17   | 3.36        | 16667                    |
| Keratin 23                          |                                                        | Krt1-23   | 64.4        | 94179                    |
| Periplakin                          |                                                        | Ppl       | 6.55        | 19041                    |
| <b>Keratinocyte differentiation</b> |                                                        | Sciellin  | Scel        | 4.46                     |
|                                     | Transglutaminase 1                                     | Tgm1      | 3.02        | 21816                    |
|                                     | Elongative of very long chain fatty acids like 4       | Elovl4    | 9.87        | 83603                    |
| <b>Epidermi Lipid Synthesis</b>     | Fatty acid binding protein 5                           | Fabp5     | 3.19        | 16592                    |
| <b>Calcium binding proteins</b>     | S100 Calcium binding protein A7A                       | S100a15   | 10.11       | 381493                   |
|                                     | S100 Hornerin                                          | Hnr       | 2.97        | 68723                    |
|                                     | Calcium binding epidermal differentiation locus s100a9 | S100a9    | 2.94        | 20202                    |
|                                     | Calcium binding epidermal differentiation locus s100a8 | S100a8    | 3.52        | 20201                    |
|                                     | Calmodulin 4                                           | Calm4     | 14.62       | 80796                    |
| <b>Adhesion molecules</b>           | Gap junction beta 2 (connexin 26)                      | Gjb2      | 49.81       | 14619                    |
|                                     | Gap junction beta 3                                    | Gjb3      | 10.82       | 14620                    |
|                                     | Claudin 4                                              | Cldn4     | 24.82       | 12740                    |
|                                     | Tubulin, beta 2B class IIB                             | Tubb2b    | 2.05        | 73710                    |
