# Supplementary material for: Ablation of Coactivator Med1 Switches the Cell Fate of Dental Epithelia to That Generating Hair
Source: PubMed Central journal article supplement (PMC4065011; doi:10.1371/journal.pone.0099991), 2014-06-20
Supplement: pone.0099991.s007.pdf [file pone.0099991.s007.pdf]

# Table S4

| Category                                      | Entrez Gne Name                                 | Symbol                                                                   | Fold change<br>CL/Mat<br>In CON | Fold change<br>KO/CON<br>in CL | Location      | Entrez<br>Gene ID for<br>mouse |        |
|-----------------------------------------------|-------------------------------------------------|--------------------------------------------------------------------------|---------------------------------|--------------------------------|---------------|--------------------------------|--------|
| ESC                                           | sonic hedgehog                                  | <b>Shh</b>                                                               | 15.91                           | -2.43                          | Extracellular | 20423                          |        |
|                                               | twist homolog 2 (Drosophila)                    | Twist2                                                                   | 10.62                           | -0.94                          | Nucleus       | 13345                          |        |
|                                               | delta-like 1 homolog (Drosophila)               | <b>Dlk1</b>                                                              | 10.16                           | -0.87                          | Extracellular | 13386                          |        |
|                                               | microfibrillar-associated protein 4             | <b>Mfap4</b>                                                             | 9.9                             | -0.75                          | Extracellular | 76293                          |        |
|                                               | calcium channel, voltage-dependent, T type, a1H | Cacna1h                                                                  | 8.87                            | -0.09                          | Membrane      | 58226                          |        |
|                                               | unc-5 homolog C (C. elegans)                    | Unc5c                                                                    | 8.61                            | -0.34                          | Membrane      | 22253                          |        |
|                                               | R-spondin 4                                     | RSPO4                                                                    | 8.58                            | -1.12                          | Unknown       | 228770                         |        |
|                                               | matrilin 4 (collagen-like)                      | <b>Matn4</b>                                                             | 7.86                            | -0.64                          | Extracellular | 17183                          |        |
|                                               | immunoglobulin superfamily, member 9            | Igsf9                                                                    | 7.81                            | -0.31                          | Membrane      | 93842                          |        |
|                                               | keratan sulfate Gal-6 sulfotransferase 1        | Chst1                                                                    | 7.68                            | -0.74                          | Cytoplasm     | 76969                          |        |
|                                               | elastin microfibril interfacier 2               | Emilin2                                                                  | 7.6                             | -0.5                           | Extracellular | 246707                         |        |
|                                               | wingless-type MMTV integration site family, 3A  | Wnt3a                                                                    | 7.49                            | -0.36                          | Extracellular | 24117                          |        |
|                                               | HF-SC                                           | ADAM metallopeptidase with thrombospondin 19                             | <b>Adamts19</b>                 | 10.23                          | -1.24         | Extracellular                  | 240322 |
|                                               |                                                 | glycoprotein hormone alpha 2 von Willebrand factor A domain containing 2 | Gpha2                           | 10.11                          | -0.05         | Extracellular                  | 170458 |
|                                               |                                                 |                                                                          | <b>Vwa2</b>                     | 10.11                          | -2.2          | Extracellular                  | 240675 |
| protein phosphatase 1, regulatory subunit 3C  |                                                 | Ppp1r3c                                                                  | 9.47                            | -1.44                          | Cytoplasm     | 53412                          |        |
| sclerostin domain containing 1                |                                                 | Sostdc1                                                                  | 9.39                            | -1.45                          | Extracellular | 66042                          |        |
| glypican 3                                    |                                                 | Gpc3                                                                     | 8.75                            | -0.88                          | Membrane      | 14734                          |        |
| connective tissue growth factor, Ctgf         |                                                 | <b>Ctgf</b>                                                              | 2.06                            | -2.75                          | Extracellular | 14219                          |        |
| proline arginine-rich end leucine-rich repeat |                                                 | <b>Prelp</b>                                                             | 1.85                            | -3                             | Extracellular | 116847                         |        |
| inactive X specific transcripts, Xist         |                                                 | Xist                                                                     | 2.14                            | -2.96                          | Nucleus       | 213742                         |        |
| cysteine rich protein 61, Cyr61               |                                                 | <b>Cyr61</b>                                                             | 1.61                            | -3.01                          | Extracellular | 16007                          |        |
| sox9                                          | Sox9                                            | 1.83                                                                     | -0.89                           | Nucleus                        | 20682         |                                |        |
| TAC                                           | S100 calcium binding protein A8 (calgranulin B) | S100a8                                                                   | -                               | 2.35                           | Cytoplasm     | 20201                          |        |
|                                               | S100 calcium binding protein A9 (calgranulin B) | S100a9                                                                   | -                               | 2.73                           | Cytoplasm     | 20202                          |        |
|                                               | chitinase 3-like 1 (Chi3l1), mRNA.              | Chi3l1                                                                   |                                 | 2.17                           | Extacellular  | 12654                          |        |
